# Supplementary material for: Measurement report: Wintertime aerosol characterization at an urban traffic site in Helsinki Finland
Source: Copernicus journal article supplement (doi:10.5194/egusphere-2024-2235), 2024-10-07
Supplement: Supplementary file 1 [file egusphere-2024-2235-supplement.pdf]

1 **SUPPLEMENT**

2 **Table S1.** List showing which compounds were analysed from each sample types and which detector was use.

|                        | Canister<br>Samples | In situ<br>Samples | Tube<br>Samples | Canister<br>Samples        | In situ<br>Samples | Tube<br>Samples |
|------------------------|---------------------|--------------------|-----------------|----------------------------|--------------------|-----------------|
| Ethane                 | FID                 |                    |                 | 4-Ethyltoluene             | MS                 | MS              |
| Ethene                 | FID                 |                    |                 | 1,3,5-Trimethylbenzene     | MS                 | MS              |
| Propane                | FID                 |                    |                 | 2-Ethyltoluene             | MS                 | MS              |
| Propene                | FID                 |                    |                 | 1,2,4-Trimethylbenzene     | MS                 | MS              |
| 2-Methylpropane        | FID                 |                    |                 | 1,2,3-Trimethylbenzene     | MS                 | MS              |
| Butane                 | FID                 |                    |                 | Hexane                     | MS                 | MS              |
| Ethyne                 | FID                 |                    |                 | Heptane                    | MS                 | MS              |
| T-but-2-ene            | FID                 |                    |                 | Octane                     | MS                 | MS              |
| But-1-ene              | FID                 |                    |                 | Nonane                     | MS                 | MS              |
| Cis-but-2-ene          | FID                 |                    |                 | Decane                     | MS                 | MS              |
| 2-Methylbutane         | FID                 |                    |                 | Undecane                   | MS                 | MS              |
| n-pentane              | FID                 |                    |                 | Dodecane                   | MS                 | MS              |
| 1,3-butadiene          | FID                 |                    |                 | Tridecane                  | MS                 | MS              |
| T-pent-2-ene           | FID                 |                    |                 | Tetradecane                | MS                 | MS              |
| Pent-1-ene             | FID                 |                    |                 | Pentadecane                | MS                 | MS              |
| Isoprene               | FID                 |                    |                 | Furfural                   | MS                 | MS              |
| $\alpha$ -pinene       |                     | MS                 | MS              | Benzyl alcohol             | MS                 | MS              |
| Camphene               |                     | MS                 | MS              | 1,3-Diethylbenzene         | MS                 | MS              |
| Myrcene                |                     | MS                 | MS              | o-cresol                   | MS                 | MS              |
| $\beta$ -pinene        |                     | MS                 | MS              | 1,4-Diethylbenzene         | MS                 | MS              |
| Carene                 |                     | MS                 | MS              | 2-Propyltoluene            | MS                 | MS              |
| p-Cymene               |                     | MS                 | MS              | p-cresol                   | MS                 | MS              |
| Limonene               |                     | MS                 | MS              | 2-Ethyl-p-xylene           | MS                 | MS              |
| 1,8-Cineol             |                     | MS                 | MS              | 1,2,4,5-Tetramethylbenzene | MS                 | MS              |
| Terpinolene            |                     | MS                 | MS              | 1,3,5-Triethylbenzene      | MS                 | MS              |
| $\beta$ -caryophyllene |                     | MS                 | MS              | 1,4-Dibutylbenzene         | MS                 | MS              |
| Benzene                |                     | MS                 | MS              | Naphthalene                | MS                 | MS              |
| Tetrachloromethane     |                     | MS                 | MS              | Acenaphthylene             | MS                 | MS              |
| Toluene                |                     | MS                 | MS              | Acenaphthene               | MS                 | MS              |
| Ethylbenzene           |                     | MS                 | MS              | Fluorene                   | MS                 | MS              |
| p/m-xylene             |                     | MS                 | MS              | Anthracene                 | MS                 | MS              |
| Styrene                |                     | MS                 | MS              | Phenanthrene               | MS                 | MS              |
| o-xylene               |                     | MS                 | MS              | Fluoranthene               | MS                 | MS              |
| Propylbenzene          |                     | MS                 | MS              | Pyrene                     | MS                 | MS              |
| 3-Ethyltoluene         |                     | MS                 | MS              |                            |                    |                 |

3  
4

5 **Table S2.** Instruments at the UB Supersite (SMEAR III).

| <b>Mast (31 m, agl)</b>                                                                           |                                                                                                             |
|---------------------------------------------------------------------------------------------------|-------------------------------------------------------------------------------------------------------------|
| Quantity                                                                                          | Instrument                                                                                                  |
| Air temperature (4, 8, 16 and 31 m)                                                               | Platinum resistance thermometer (Pt-100)                                                                    |
| Wind (4, 8, 16 and 31 m)                                                                          | 2D ultrasonic anemometer (Thies Clima 2.1x)                                                                 |
| Global radiation (31 m)                                                                           | Kipp and Zonen CNR1                                                                                         |
| Reflected global (31 m)                                                                           | Kipp and Zonen CNR1                                                                                         |
| Longwave radiation in (31 m)                                                                      | Kipp and Zonen CNR1                                                                                         |
| Longwave radiation out (31 m)                                                                     | Kipp and Zonen CNR1                                                                                         |
| Photosynthetic Active Radiometer (PAR, 31 m)                                                      | Kipp and Zonen PAR lite                                                                                     |
| Reflected PAR (31 m)                                                                              | Kipp and Zonen PAR lite                                                                                     |
| Flux of momentum and heat (Eddy Covariance, 31)                                                   | Ultrasonic anemometer (Metek USA-1)                                                                         |
| Flux of CO <sub>2</sub> and H <sub>2</sub> O (Eddy Covariance, 31)                                | High frequency gas analyser (Li-Cor 7500 & 7000, infra-red absorption)                                      |
| Total number concentration flux of aerosol particles (Eddy Covariance)                            | Water Condensation Particle Counter (WCPC, TSI-3781)                                                        |
| <b>(2-4 m agl)</b>                                                                                |                                                                                                             |
| Particle size distribution (size range : 3–950 nm)                                                | The Differential Mobility Particle Sizer (Hauke-type DMA, 10.9 cm+TSI 3025; Hauke-type DMA, 28 cm+TSI 3010) |
| Particle concentration (size range >7 nm (Dp50), and the maximum detectable particle size > 3 μm) | Condensation particle counter (CPC, TSI 3756)                                                               |
| Particle size distribution (size range: 0.5– 20 nm)                                               | Aerodynamic particle sizer (APS, TSI 3321)                                                                  |
| Particle size distribution (size range: 1.3-4.5 nm)                                               | Nano Condensation Nucleus Counter System (Airmodus A11 nCNC)                                                |

|                                                                                        |                                                                             |
|----------------------------------------------------------------------------------------|-----------------------------------------------------------------------------|
| Mobility distribution of ions (0.8–40 nm) and size distribution of particles (2–40 nm) | Neutral cluster and Air Ion Spectrometer (Airel Ltd)                        |
| Nitrogen oxides (NO <sub>x</sub> )                                                     | Chemiluminescence + thermal converter (TEI42S)                              |
| Ozone (O <sub>3</sub> )                                                                | IR-absorption photometer (TEI49)                                            |
| Carbon monoxide (CO)                                                                   | Non-dosperive infrared (NDIR) absorption (Horiba APMA 370)                  |
| Sulphur dioxide (SO <sub>2</sub> )                                                     | UV-flurescence (Horiba APSA 360)                                            |
| PM <sub>2.5</sub> and PM <sub>10</sub>                                                 | TEOM 1405 (Thermo Scientific)                                               |
| <b>Physicum roof (29 m agl)</b>                                                        |                                                                             |
| Wind                                                                                   | Cup anemometer (Vaisala WAA141)                                             |
| Air temperature                                                                        | Platimun resistance thermometer                                             |
| Sea level pressure                                                                     | Barometer (Vaisala HMP243)                                                  |
| Relative humidity                                                                      | Platimun resistance thermometer + thin film polymer sensor (Vaisala DPA500) |
| Dew point temperature                                                                  | Platimun resistance thermometer + thin film polymer sensor (Vaisala DPA500) |
| Precipitation                                                                          | Weighting rain gauge (Ott Pluvio)                                           |
| Global radiation                                                                       | Kipp and Zonen CNR1                                                         |
| Reflected global                                                                       | Kipp and Zonen CNR1                                                         |
| Longwave radiation in                                                                  | Kipp and Zonen CNR1                                                         |
| Longwave radiation out                                                                 | Kipp and Zonen CNR1                                                         |
| PAR                                                                                    | Kipp and Zonen PAR lite                                                     |
| Reflected PAR                                                                          | Kipp and Zonen PAR lite                                                     |
| Visibility                                                                             | PWD                                                                         |

7 **Table S3.** Average concentrations of measured components during the traffic (averages without episodes) dominated period on workdays  
8 and weekends and their averages during four different episodes at the UB Supersite. PN concentration at UB Supersite was measured using  
9 an ultrafine CPC ( $D_p > 2.5$  nm).

| <b>Compound</b>                                          | <b>Traffic<br/>workdays</b> | <b>Traffic<br/>weekends</b> | <b>E1<br/>22.1.2022<br/>15:00<br/>23.1.2022<br/>10:00</b> | <b>E2<br/>31.1.2022<br/>07:00<br/>5.2.2022<br/>16:00</b> | <b>E3<br/>13.2.2022<br/>12:00<br/>17.2.2022<br/>23:00</b> |
|----------------------------------------------------------|-----------------------------|-----------------------------|-----------------------------------------------------------|----------------------------------------------------------|-----------------------------------------------------------|
| <i>PN</i> ( $p\ cm^{-3}$ )                               | 7347                        | 5280                        | 12370                                                     | 13141                                                    | 7004                                                      |
| <i>LDSA</i> ( $\mu m^2\ cm^{-3}$ )                       | 3.8                         | 3.5                         | 13.0                                                      | 13.7                                                     | 9.8                                                       |
| <i>PM<sub>2.5</sub></i> ( $\mu g\ m^{-3}$ )              | 1.3                         | 1.2                         | 6.3                                                       | 7.3                                                      | 5.6                                                       |
| <i>PM<sub>2.5-10</sub></i> ( $\mu g\ m^{-3}$ )           | 1.8                         | 1.9                         | 1.2                                                       | 3.0                                                      | 3.1                                                       |
| <i>NO</i> ( $\mu g\ m^{-3}$ )                            | 1.5                         | 1.3                         | b.d.l                                                     | 10.5                                                     | 2.7                                                       |
| <i>NO<sub>2</sub></i> ( $\mu g\ m^{-3}$ )                | 9.4                         | 6.7                         | 11.0                                                      | 24.5                                                     | 16.2                                                      |
| <i>BC</i> ( $\mu g\ m^{-3}$ )                            | 0.18                        | 0.17                        | 0.91                                                      | 0.98                                                     | 0.70                                                      |
| <i>CO</i> (ppb)                                          | 141                         | 146                         | 197                                                       | 236                                                      | 192                                                       |
| <i>CO<sub>2</sub></i> (ppm)                              | 427                         | 428                         | 433                                                       | 443                                                      | 432                                                       |
| <i>CH<sub>4</sub></i> (ppb)                              | 2014                        | 2020                        | 2049                                                      | 2076                                                     | 2055                                                      |
| <i>O<sub>3</sub></i> ( $\mu g\ m^{-3}$ )                 | 59                          | 64                          | 57                                                        | 29                                                       | 51                                                        |
| <i>Total particulate organics</i><br>( $\mu g\ m^{-3}$ ) | 0.59                        | 0.47                        | 1.83                                                      | 1.90                                                     | 2.84                                                      |
| <i>Sulphate</i> ( $\mu g\ m^{-3}$ )                      | 0.24                        | 0.30                        | 1.21                                                      | 1.62                                                     | 1.01                                                      |
| <i>Nitrate</i> ( $\mu g\ m^{-3}$ )                       | 0.22                        | 0.13                        | 1.35                                                      | 0.65                                                     | 1.35                                                      |
| <i>Ammonium</i> ( $\mu g\ m^{-3}$ )                      | 0.24                        | 0.27                        | 0.88                                                      | 0.71                                                     | 0.83                                                      |
| <i>Chloride</i> ( $\mu g\ m^{-3}$ )                      | 0.03                        | 0.03                        | 0.05                                                      | 0.02                                                     | 0.12                                                      |

10

11

1.2 **Table S4.** Filter steps of the PDA for the figure S17.

| <b>Filter step</b>                         | <b>Parameter</b>        | <b>Traffic Supersite</b> | <b>UB Supersite</b>    |
|--------------------------------------------|-------------------------|--------------------------|------------------------|
| Derivative filter (IQR)                    | IQR factor              | 1.7                      | 1.7                    |
|                                            | Window size             | 24 h                     | 24 h                   |
| Threshold filter                           | Upper threshold         | $10^4 \text{ cm}^{-3}$   | $10^4 \text{ cm}^{-3}$ |
|                                            | Lower threshold         | $60 \text{ cm}^{-3}$     | $60 \text{ cm}^{-3}$   |
| Neighboring points filter                  | On/off                  | On                       | On                     |
| Median filter                              | Median time interval    | 30 min                   | 30 min                 |
|                                            | Median deviation factor | 1.5                      | 1.5                    |
| Sparse data filter<br>(no. of data points) | Sparse window           | 30                       | 30                     |
|                                            | Sparse threshold        | 24                       | 24                     |

1.3 **Table S5.** Filter steps of the PDA for the Figure 7.

| <b>Filter step</b>                         | <b>Parameter</b>        | <b>Traffic Supersite</b> | <b>UB Supersite</b>    |
|--------------------------------------------|-------------------------|--------------------------|------------------------|
| Derivative filter (IQR)                    | IQR factor              | 1.7                      | 1.7                    |
|                                            | Window size             | 24 h                     | 24 h                   |
| Threshold filter                           | Upper threshold         | $30^5 \text{ cm}^{-3}$   | $30^5 \text{ cm}^{-3}$ |
|                                            | Lower threshold         | $60 \text{ cm}^{-3}$     | $60 \text{ cm}^{-3}$   |
| Neighboring points filter                  | On/off                  | On                       | On                     |
| Median filter                              | Median time interval    | 30 min                   | 30 min                 |
|                                            | Median deviation factor | 1.5                      | 1.5                    |
| Sparse data filter<br>(no. of data points) | Sparse window           | 30                       | 30                     |
|                                            | Sparse threshold        | 24                       | 24                     |

14

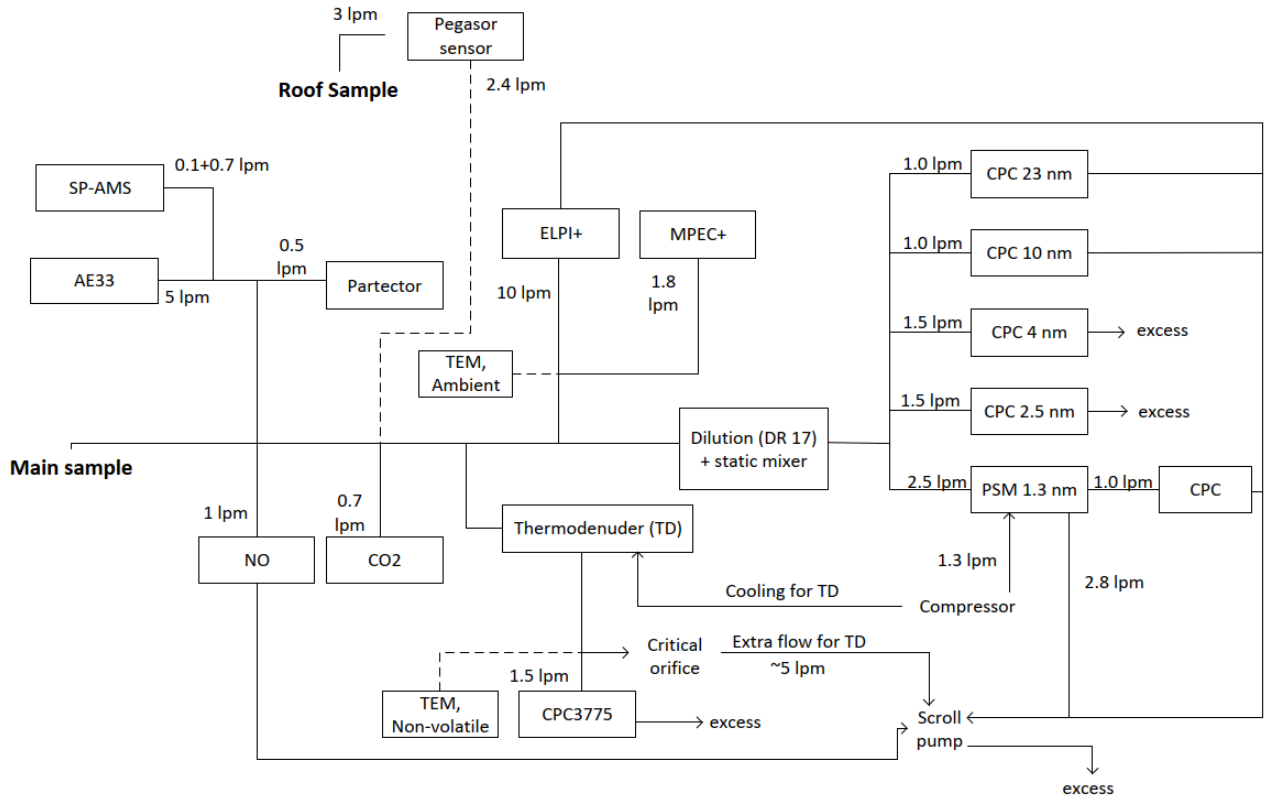

15  
16  
17

Figure S1. Measurement setup inside the Aerosol and Trace-gas mobile laboratory.

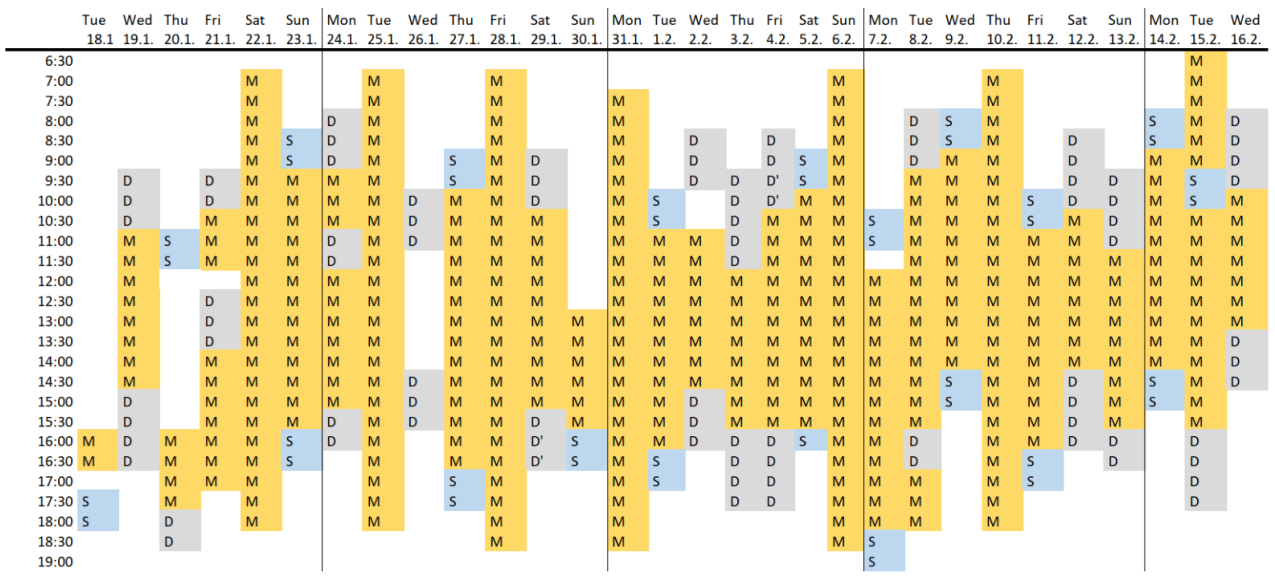

18  
19  
20

Figure S2. The measurement timeline of the Aerosol and Trace-gas mobile laboratory. Measurement activity is denoted with letters M (main street/Traffic Supersite), S (side street), D (driving), and D' (driving only along main street).

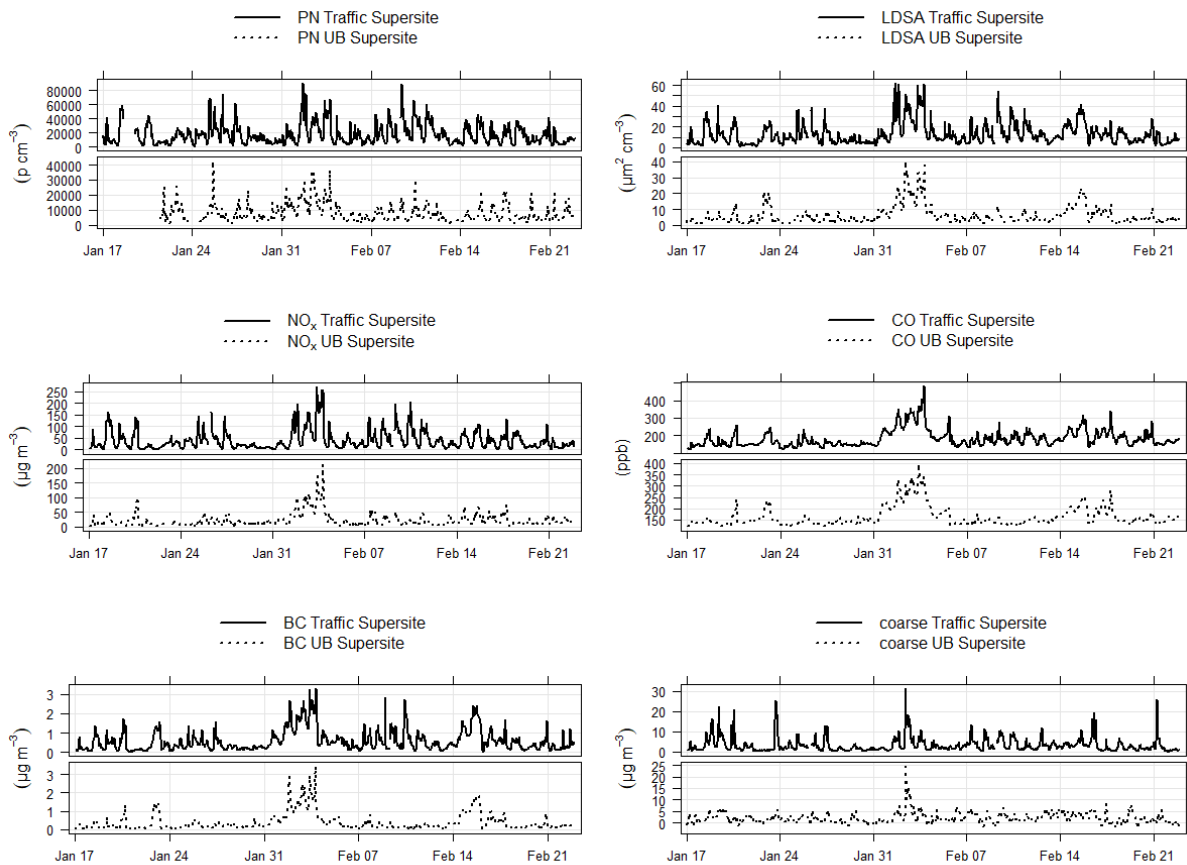

21  
 22  
 23  
 24

**Figure S3.** Time series of PN, LDSA,  $\text{NO}_x$ , CO, BC and  $\text{PM}_{2.5-10}$  at the Traffic Supersite and at the UB Supersite during the measurement period. The cut size of the CPC at the Traffic Supersite is 5.4 nm and at the UB Supersite 7 nm.

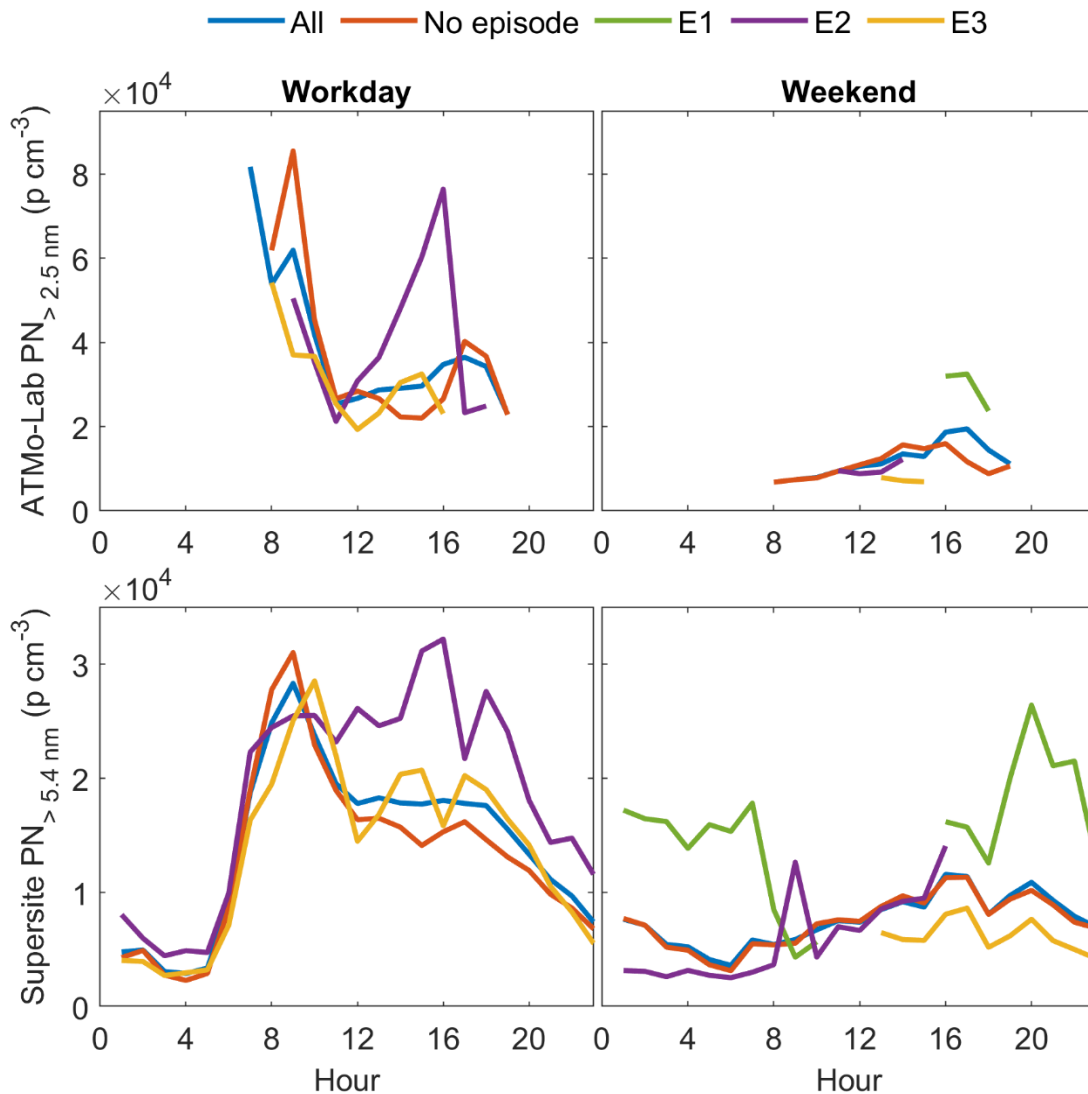

25

26

**Figure S4.** Diurnal variation of particle number concentration measured at the main street by an ATMo-Lab CPC ( $D_{p50}$ : 2.5 nm) and at the Traffic Supersite CPC ( $D_{p50}$ : 5.4 nm) on workdays and on weekends. Different episode time periods are denoted by the label.

27

Geometric mean is used for averaging. Note that the ATMo-Lab did not measure continuously next to the Supersite as it was also utilised in driving measurements during the measurement days. Also, the ATMo-Lab measured during a shorter period between 18 January to 16 February 2022. Diurnal variation hours consisting of less than 30 minutes of measurement data were discarded.

28

29

30



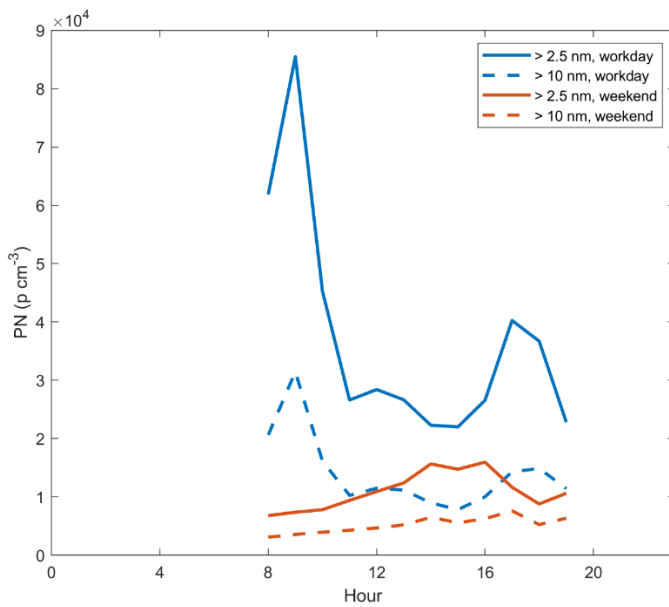

31  
32  
33  
34  
35

**Figure S5.** Diurnal variation of particle number concentration measured at the main street by ATMo-Lab on workdays and on weekends. Cut-off sizes ( $D_{p50}$ : 2.5 nm and 10 nm) of the used instruments are indicated by the legend. Episode times are excluded from the data and geometric mean is used for averaging. Diurnal variation hours consisting of less than 30 minutes of measurement data were discarded.

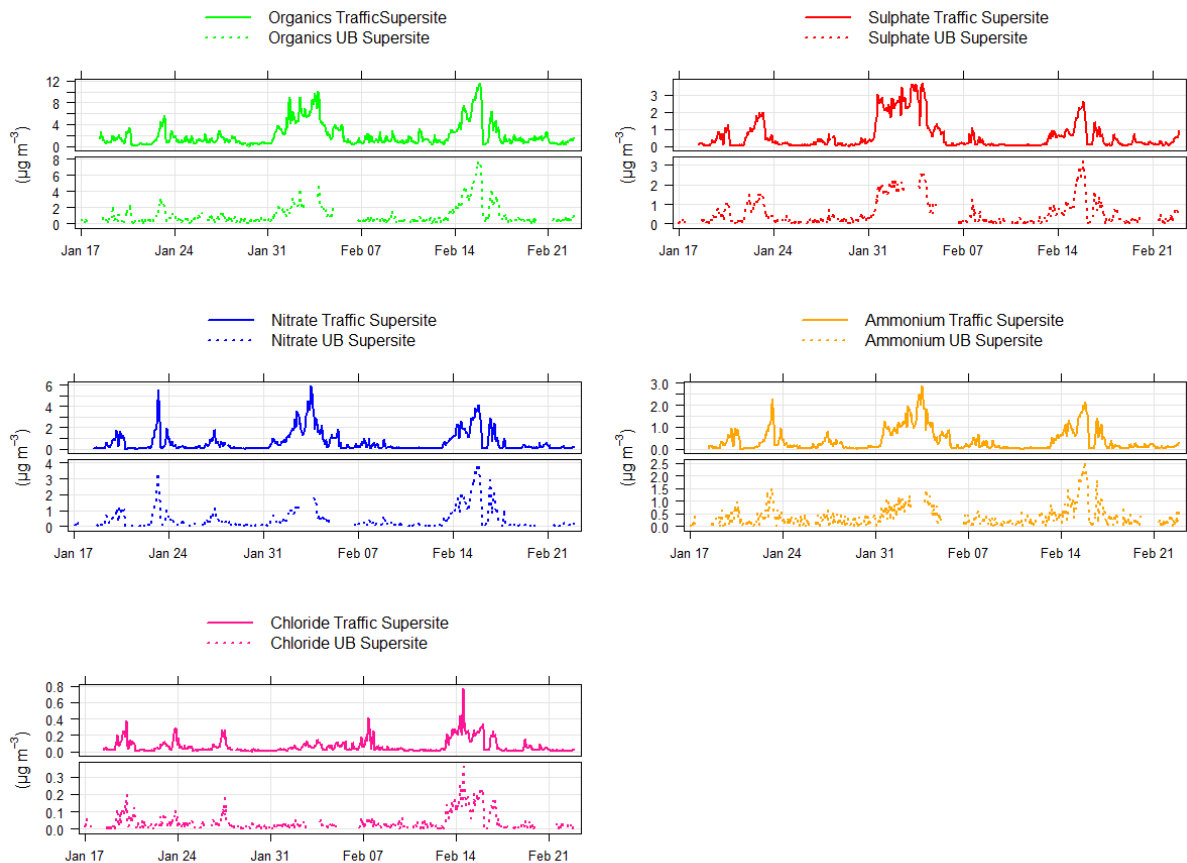

36  
37  
38  
39

**Figure S6.** Time series of organics, sulphate, nitrate, ammonium and chloride at the Traffic Supersite and at the UB Supersite during the measurement period.

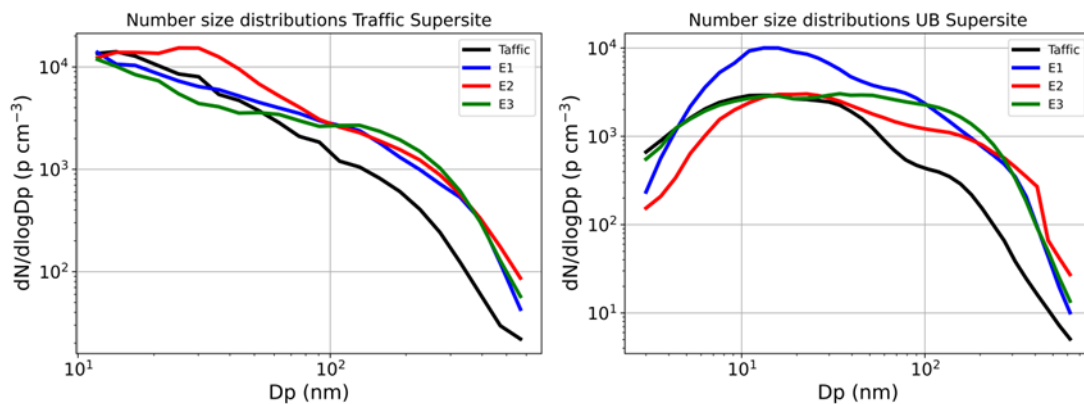

40  
41  
42

**Figure S7.** Average particle number size distributions measured with DMPS at the Traffic Supersite and at the UB Supersite stations during non-episodic situation and during the three episodes.

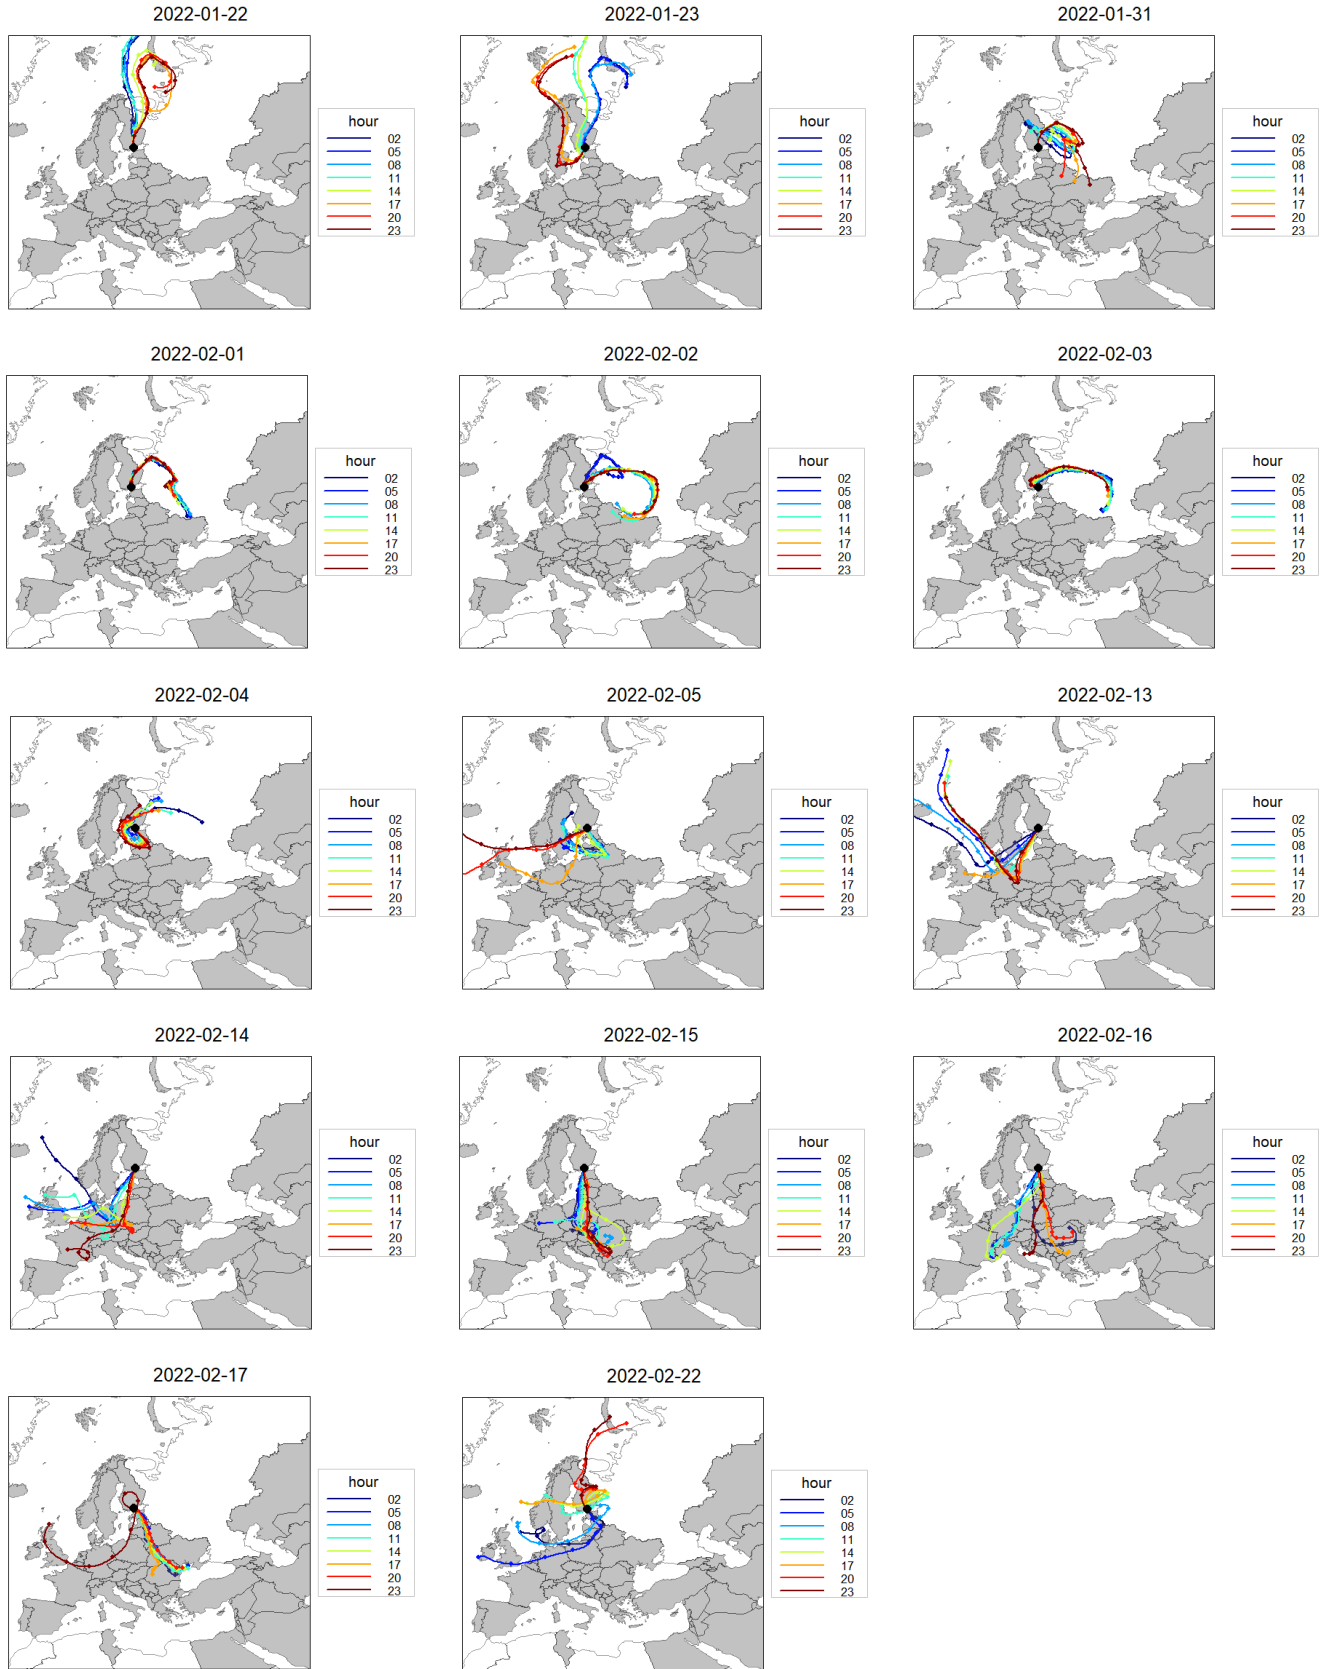

4 4 **Figure S8.** Daily 4-hour back trajectories during the episodes (local time).

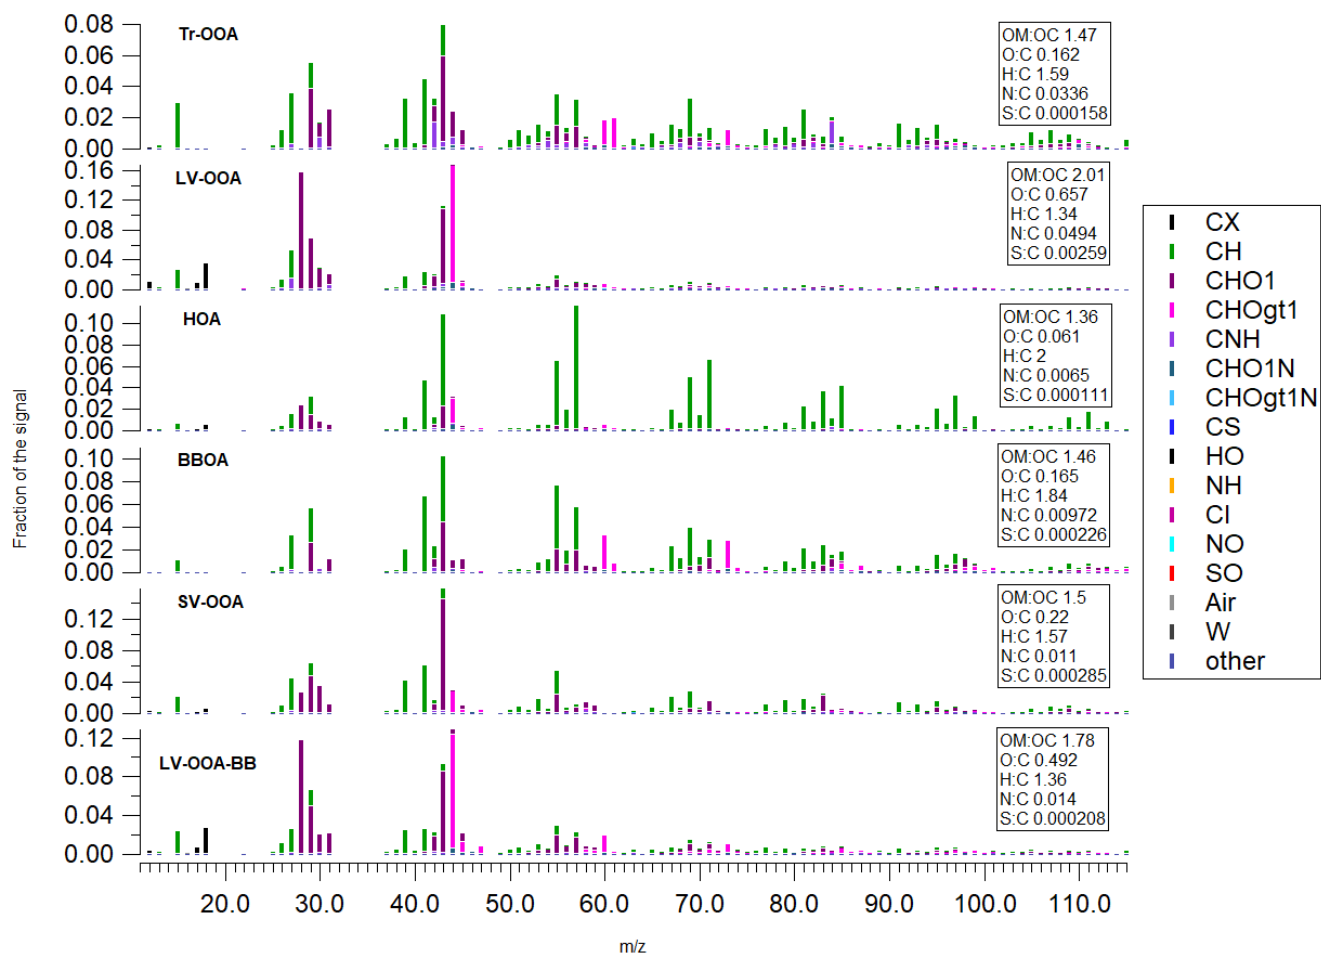

4 5

4 6 **Figure S9.** Mass spectra of the six factors obtained from PMF analysis.

4 7

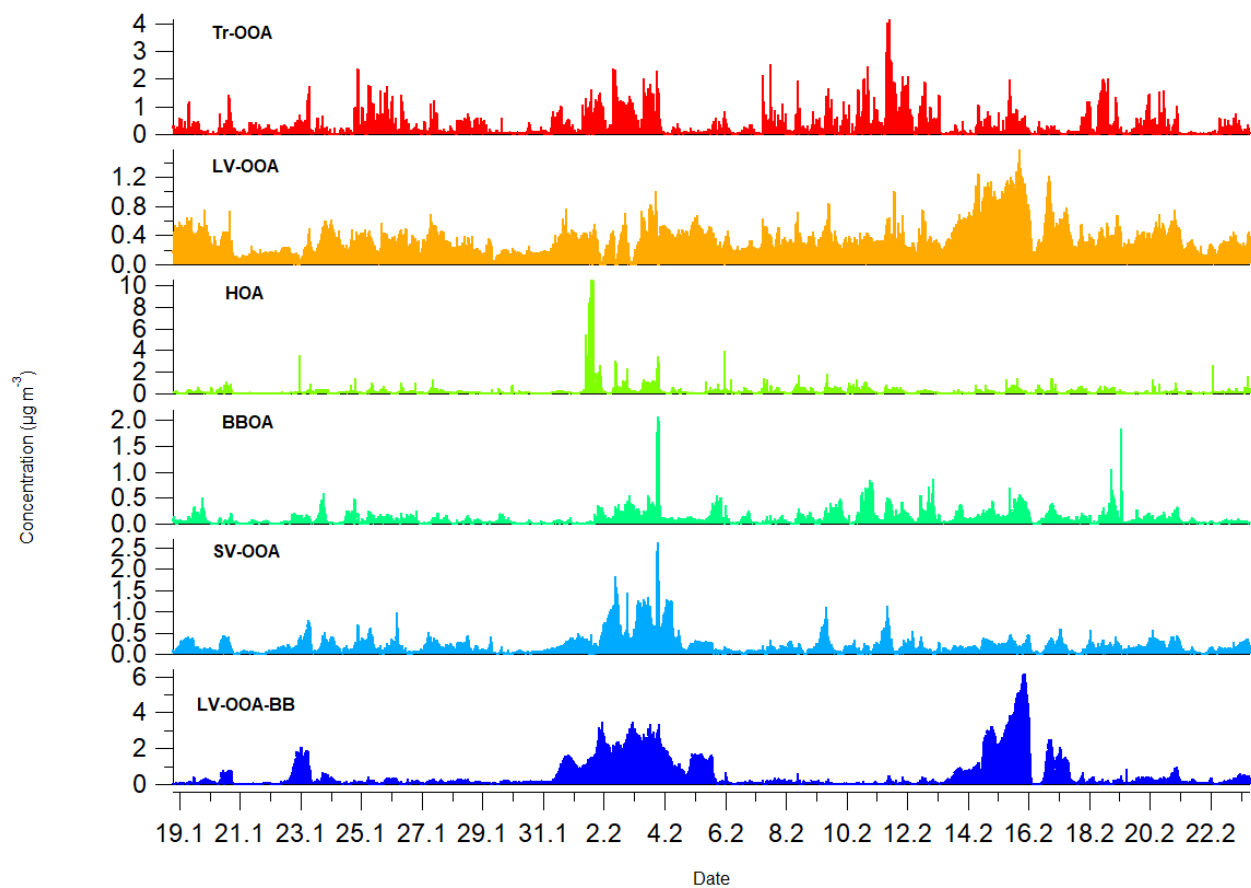

48  
49  
50

**Figure S10.** Time series of the six factors obtained from PMF analysis.

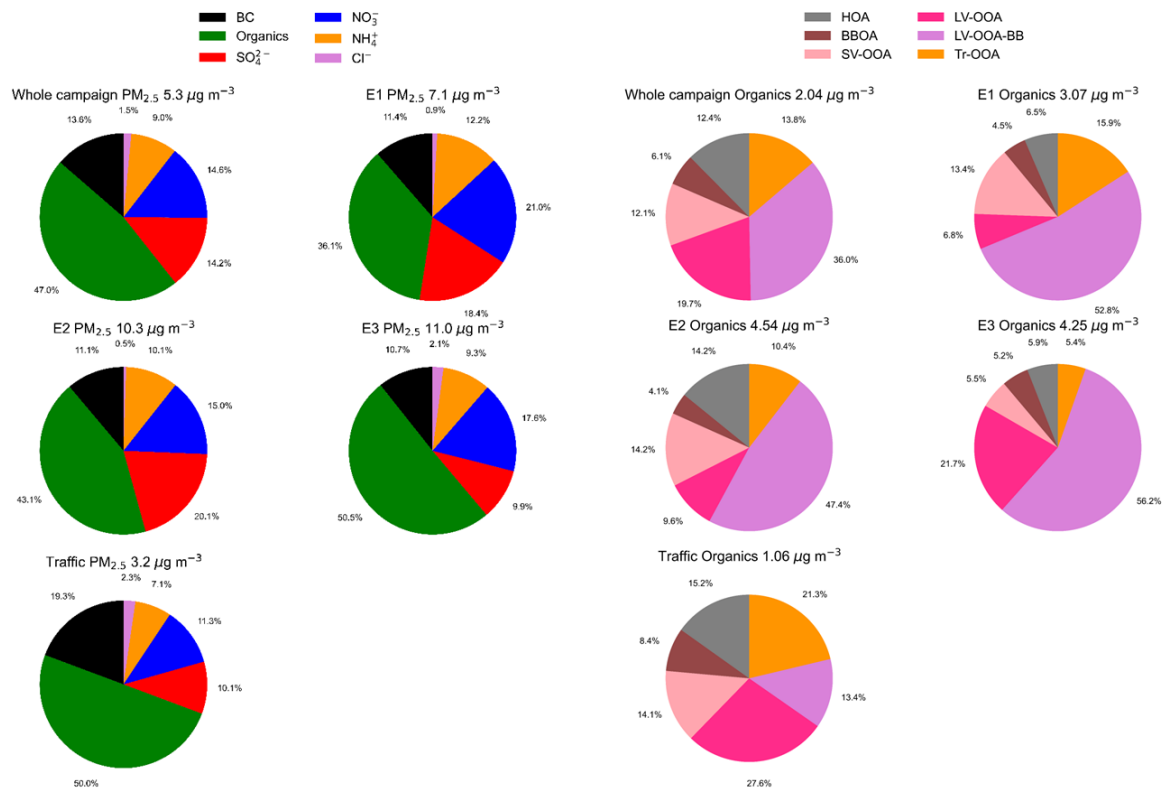

51

52

53

54

55

**Figure S11.** Pies showing the relative abundances of measured chemical components (left) and relative abundances of calculated organic fractions (right) during the whole campaign, during the three episodes (E1–E3) and during the traffic related time (non-episodes) at the Traffic Supersite.

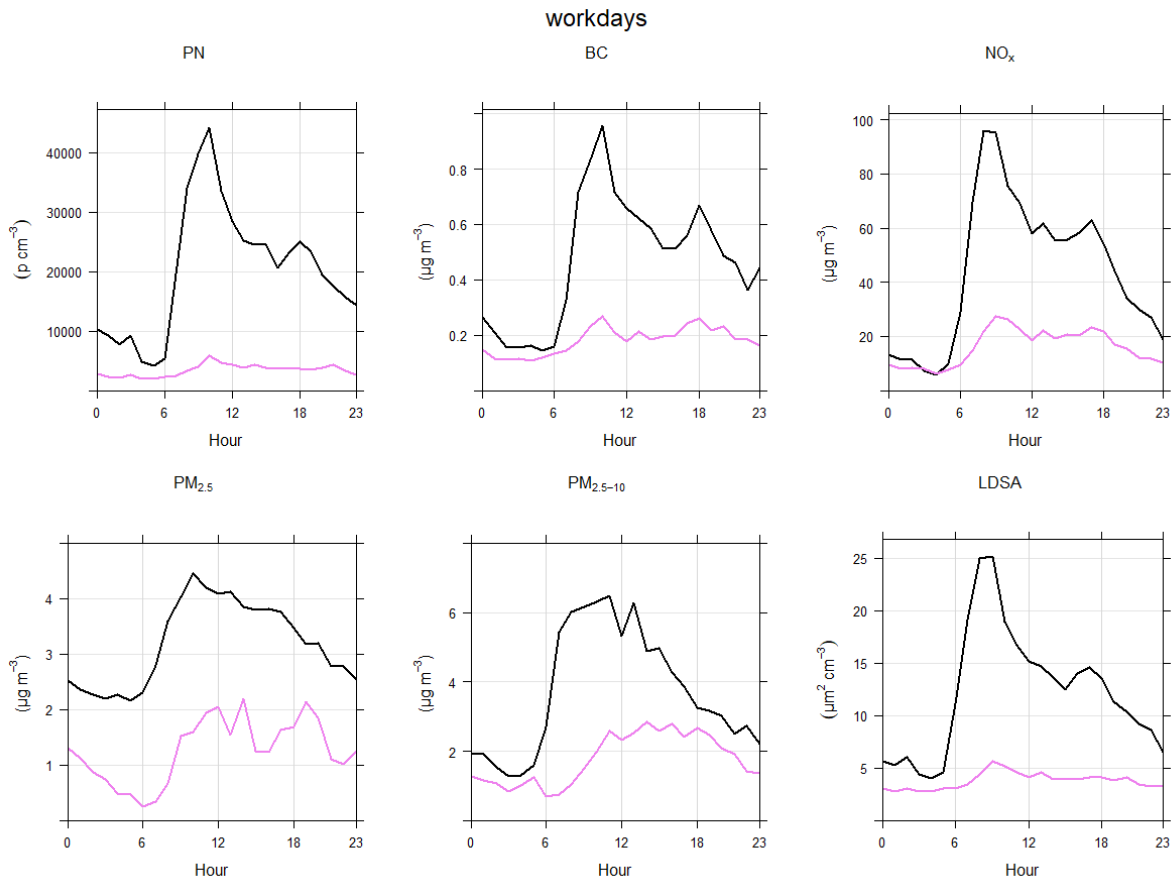

56

57

**Figure S12.** Hourly diurnal variations of concentrations of PN, BC, NO<sub>x</sub>, PM<sub>2.5</sub>, PM<sub>2.5-10</sub>, and LDSA without episodes during workdays at the Traffic Supersite (black) and at the UB Supersite (violet) stations.

58

59

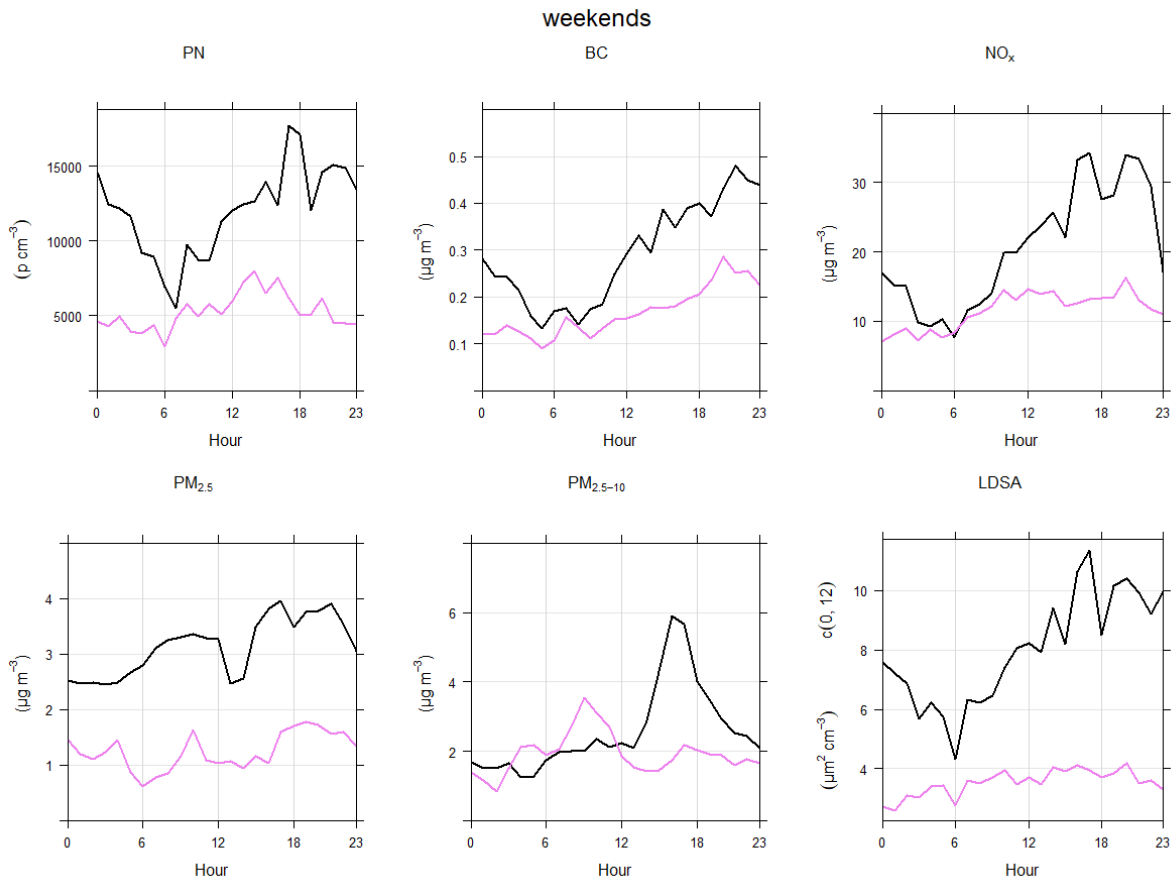

60

61 **Figure S13.** Hourly diurnal variations of concentrations of PN, BC, NO<sub>x</sub>, PM<sub>2.5</sub>, PM<sub>2.5-10</sub>, and LDSA without episodes during weekends at

62 the Traffic Supersite (black) and at the UB Supersite (violet) stations.



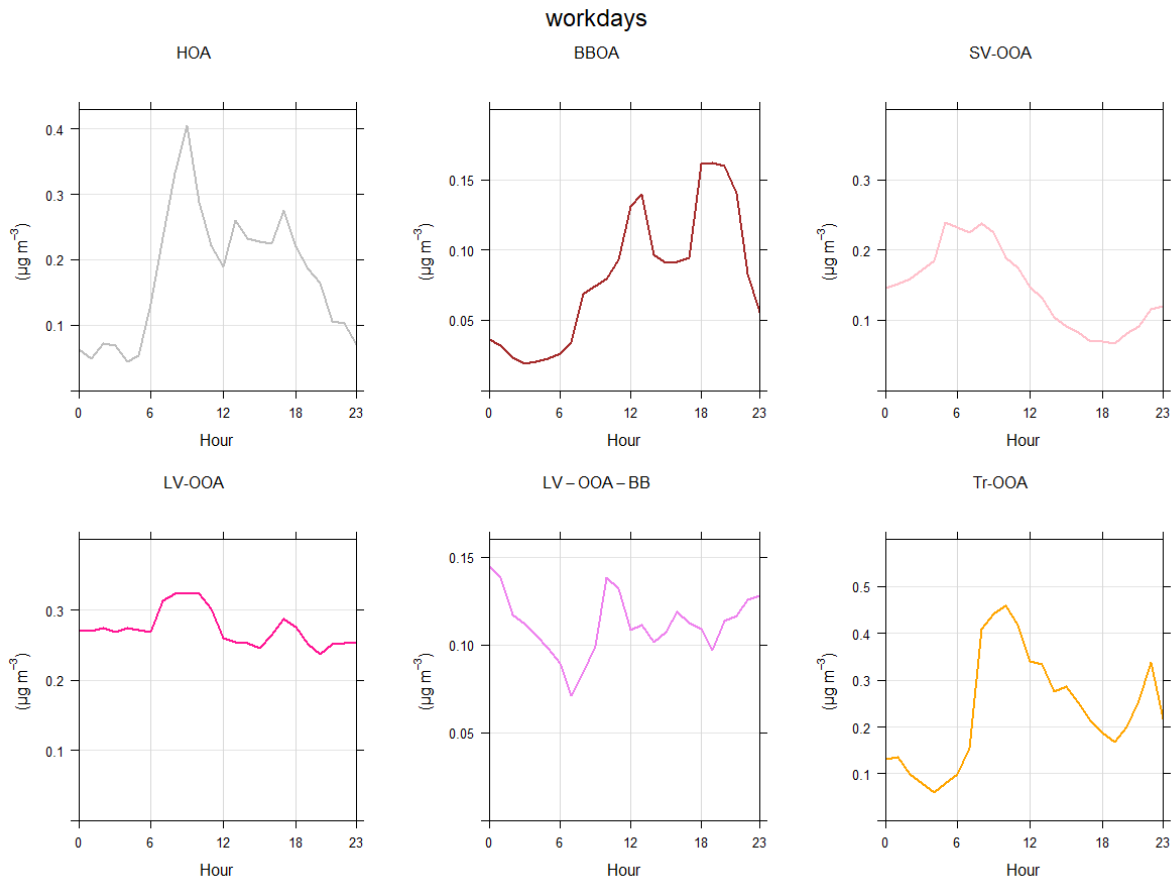

63

64

**Figure S14.** Hourly diurnal variations of concentrations of calculated organic fractions HOA, BBOA, SV-OOA, LV-OOA, LV-OOA-BB, and Tr-OOA without episodes at the Traffic Supersite during workdays.

65

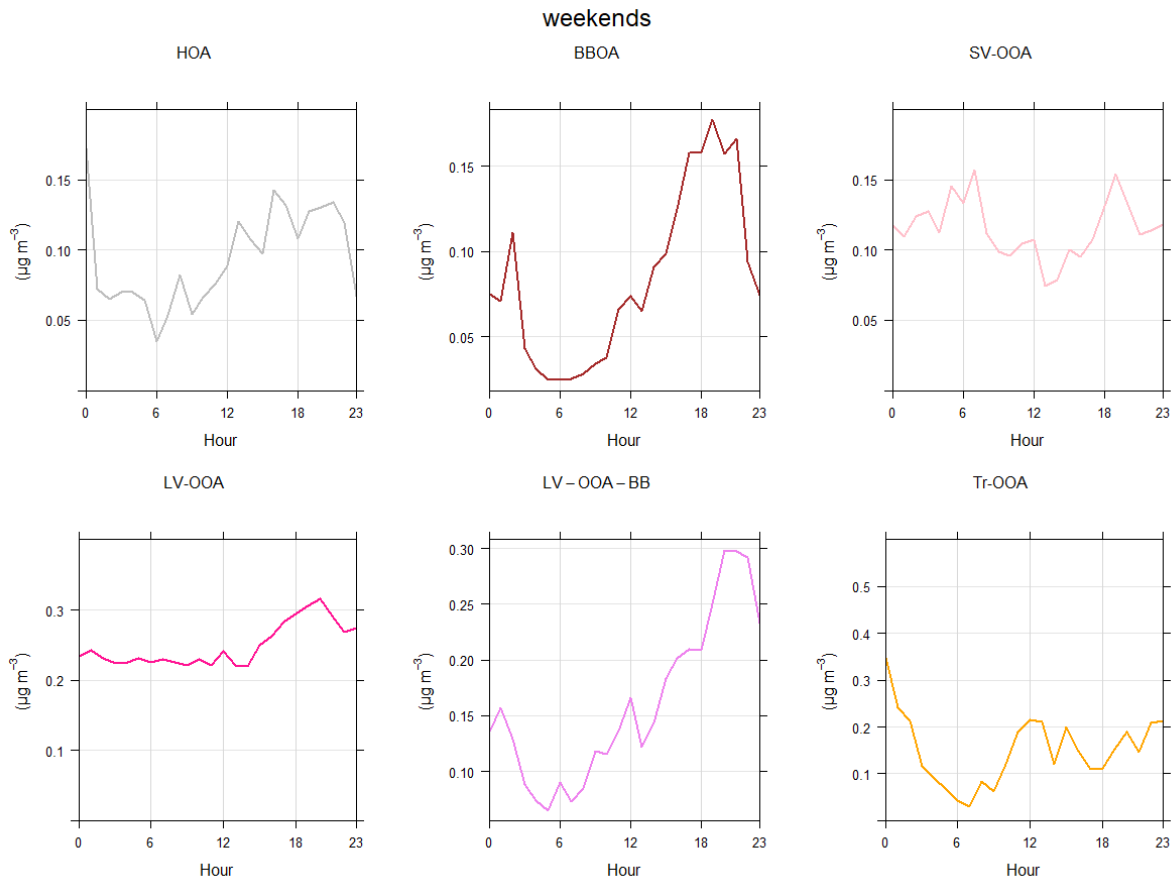

66

67

68 **Figure S15.** Hourly diurnal variations of concentrations of calculated organic fractions HOA, BBOA, SV-OOA, LV-OOA LV-OOA-BB,  
 69 and Tr-OOA without episodes at the Traffic Supersite during weekends.

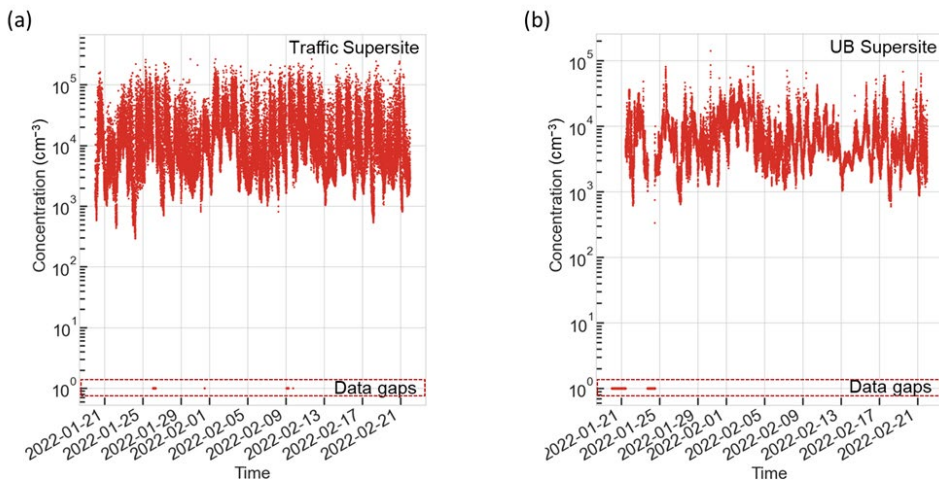

70

71 **Figure S16.** (a) CPC Traffic Supersite, 1 min resolution. (b) CPC UB Supersite, 1 min resolution. Data gaps (assigned to one) are shown  
 72 in the bottom.

73

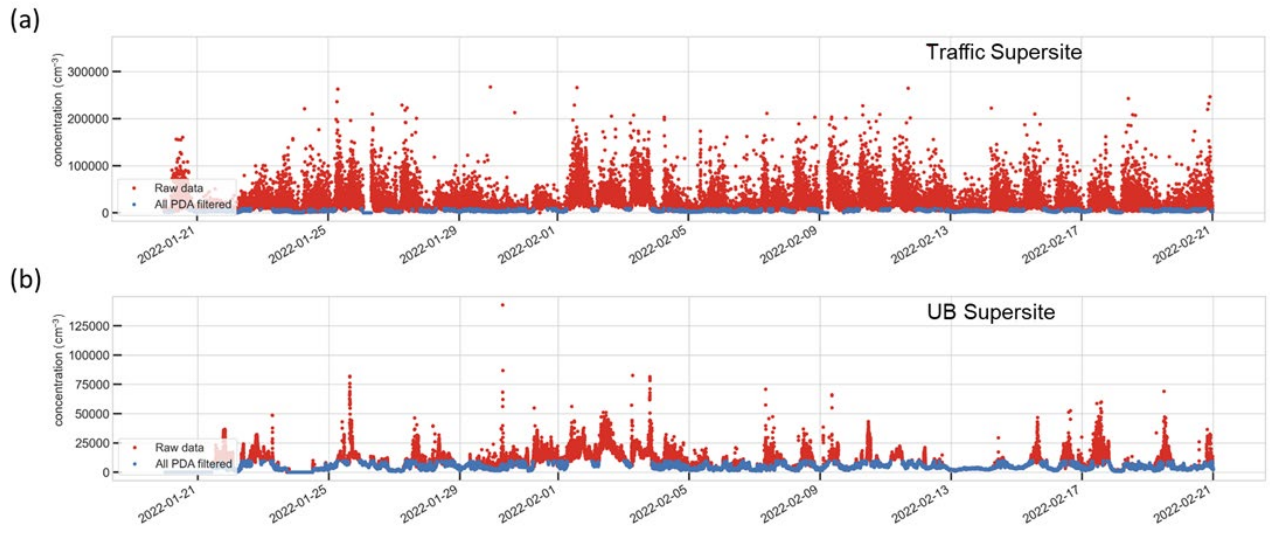

74

75

76

**Figure S17.** PDA filter results for the Traffic Supersite (a) and the UB Supersite (b). IQR derivative filter, upper threshold  $10\,000\text{ cm}^{-3}$ . See Table S
